# Supplementary material for: Nanowire-percolated piezoelectric copolymer-based highly transparent and flexible self-powered sensors
Source: Royal Society of Chemistry journal article supplement (doi:10.1039/c9ta09864j), 2019-01-01
Supplement: c9ta09864j1.pdf [file c9ta09864j1.pdf]

**Electronic Supplementary Information for:**

**Nanowires-Percolated Piezoelectric Copolymer-based**

**Highly Transparent and Flexible Self-Powered Sensors**

**Chang Kyu Jeong,<sup>‡ab</sup> Dong Yeol Hyeon,<sup>‡c</sup> Geon-Tae Hwang,<sup>d</sup> Gyoung-Ja Lee,<sup>e</sup> Min-Ku  
Lee,<sup>e</sup> Jin-Ju Park<sup>e</sup> and Kwi-Il Park<sup>\*c</sup>**

<sup>a</sup> *Division of Advanced Materials Engineering, Jeonbuk National University, 567 Baekje-daero, Deokjin-gu, Jeonju, Jeonbuk 54896, Republic of Korea*

<sup>b</sup> *Hydrogen and Fuel Cell Research Center, Jeonbuk National University, 567 Baekje-daero, Deokjin-gu, Jeonju, Jeonbuk 54896, Republic of Korea*

<sup>c</sup> *School of Materials Science and Engineering, Kyungpook National University, 80 Daehak-ro, Buk-gu, Daegu 41566, Republic of Korea*

<sup>d</sup> *Functional Ceramics Group, Korea Institute of Materials Science (KIMS), 797 Changwon-daero, Seongsan-gu, Changwon, Gyeongnam 51508, Republic of Korea*

<sup>e</sup> *Sensor System Research Team, Korea Atomic Energy Research Institute, 111 Daedeok-daero, 989 Beon-gil, Yuseong-gu, Daejeon 34057, Republic of Korea*

<sup>‡</sup>Equal contributors

<sup>\*</sup>Corresponding author

Kwi-Il Park<sup>\*</sup>

E-mail: kipark@knu.ac.kr, (Phone) +82-53-950-5564, (Fax) +82-53-950-6559

**Table S1** Sheet resistance of each point on the  $3 \times 3 \text{ cm}^2$  area of Ag NWs electrode on the P(VDF-TrFE) layer.

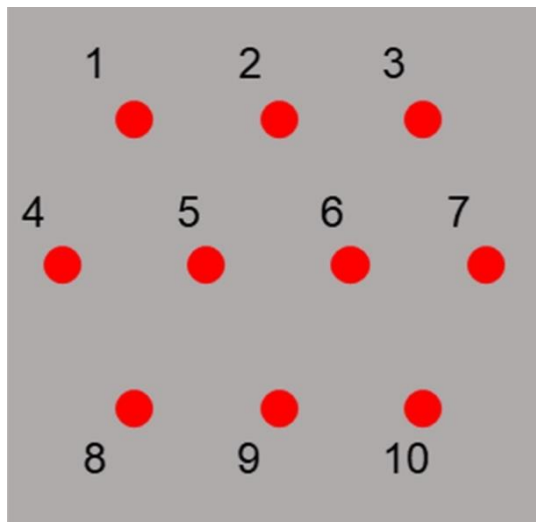

| Position | Sheet Resistance ( $\Omega \text{ sq}^{-1}$ ) |
|----------|-----------------------------------------------|
| 1        | 14                                            |
| 2        | 56                                            |
| 3        | 17                                            |
| 4        | 33                                            |
| 5        | 37                                            |
| 6        | 25                                            |
| 7        | 21                                            |
| 8        | 17                                            |
| 9        | 24                                            |
| 10       | 21                                            |

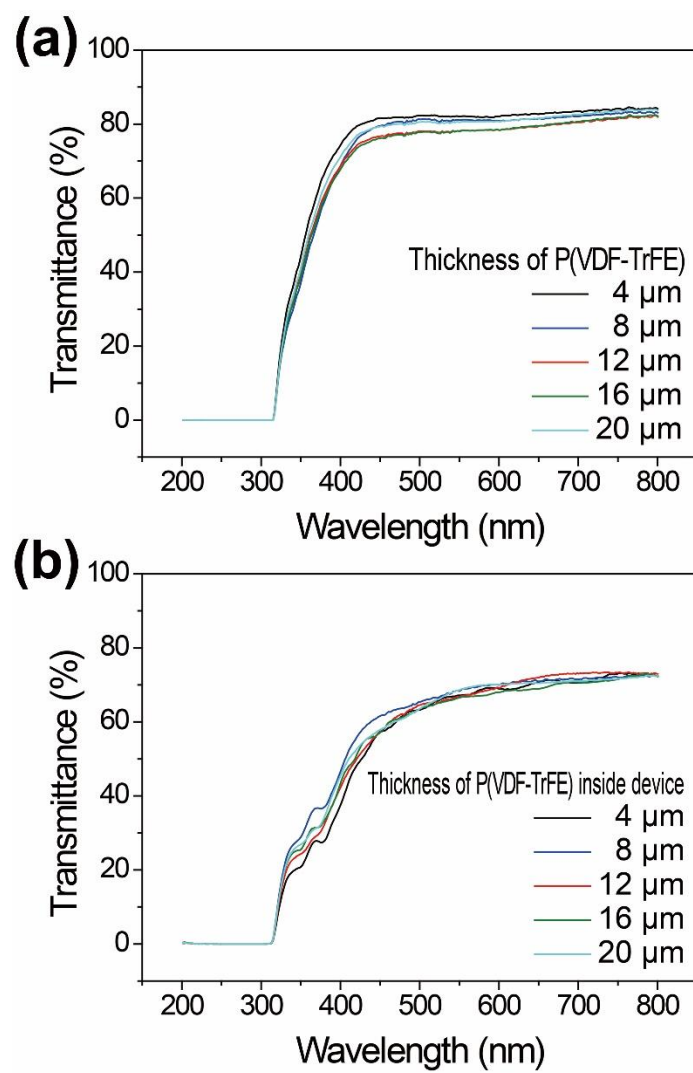

**Fig. S1** Transmittance levels of P(VDF-TrFE) layers according to its thickness (a) before and (b) after the formation of Ag NWs-based top electrode.

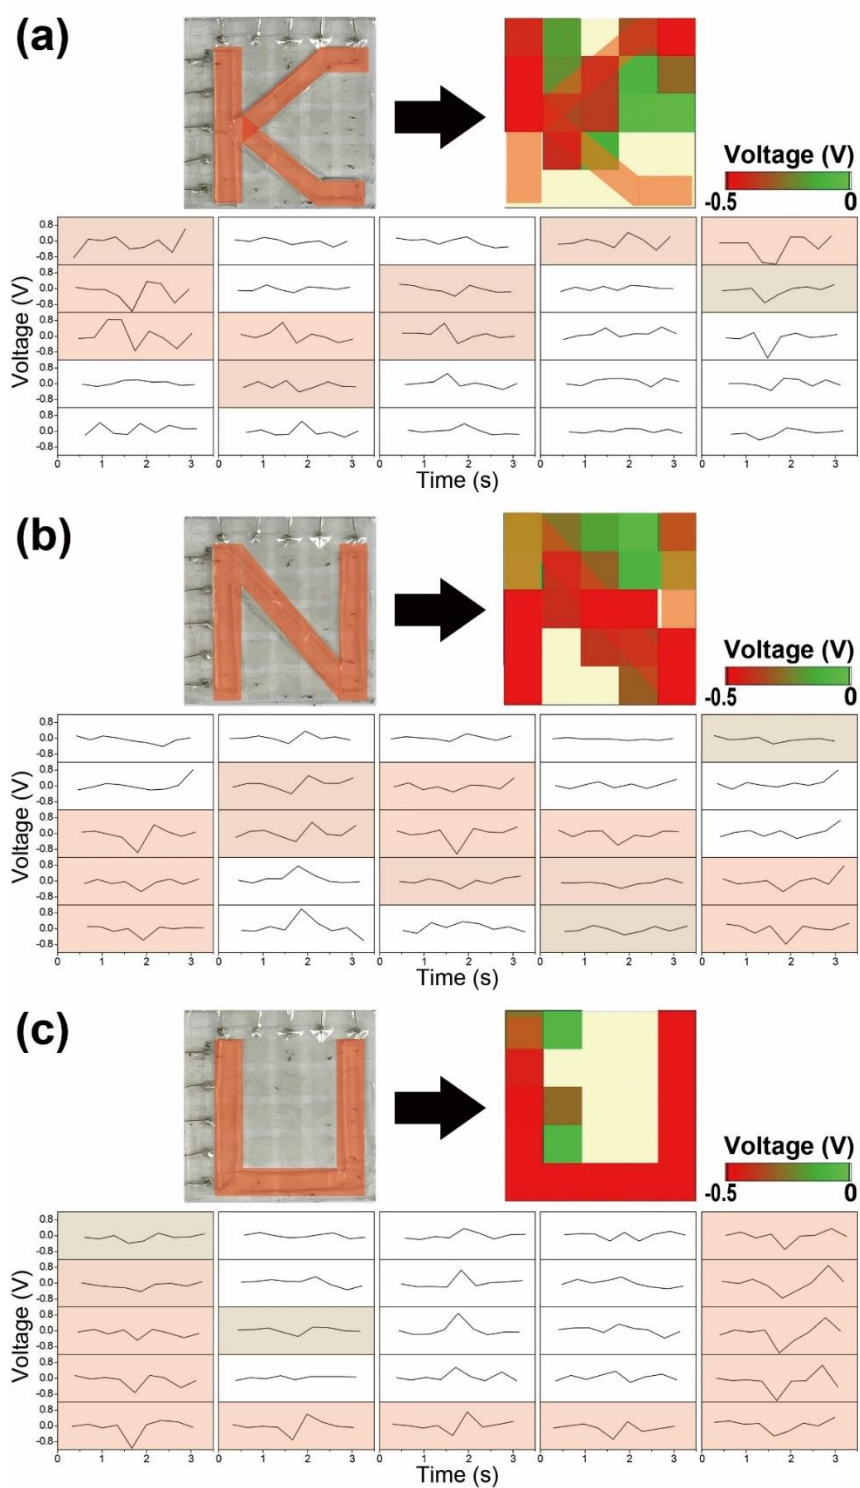

**Fig. S2** Transparent f-PEH sensor array providing self-powered signals at each multi-channel to detect the external pressure applied by letter frames of (a) K, (b) N, and (c) U shaped frames, which are visualized by the imaging program.
